# Supplementary material for: Imaging outcomes for trials of remyelination in multiple sclerosis
Source: PubMed Central journal article supplement — J Neurol Neurosurg Psychiatry. 2014 Apr 25;85(12):1396–404. doi: 10.1136/jnnp-2014-307650 (PMC4335693; doi:10.1136/jnnp-2014-307650), 2014-04-25

**Supplementary Figure 1:** Axial DTI of corresponding slices of the brain of an MS patient demonstrating a) fractional anisotropy; b) radial diffusivity; c) axial diffusivity. Arrows highlight corresponding lesions on each sequence.

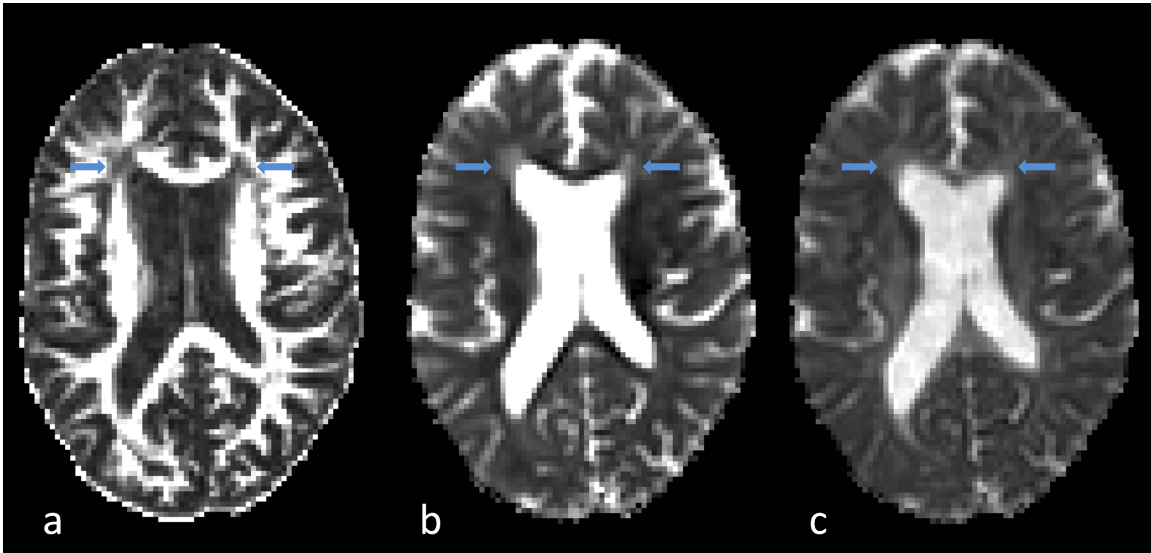

**Supplementary Figure 2:** Optic nerve imaging, using a T2-weighted (fat-suppressed) coronal-oblique sequence, demonstrating a) normal right optic nerve; b) left optic nerve with a lesion.

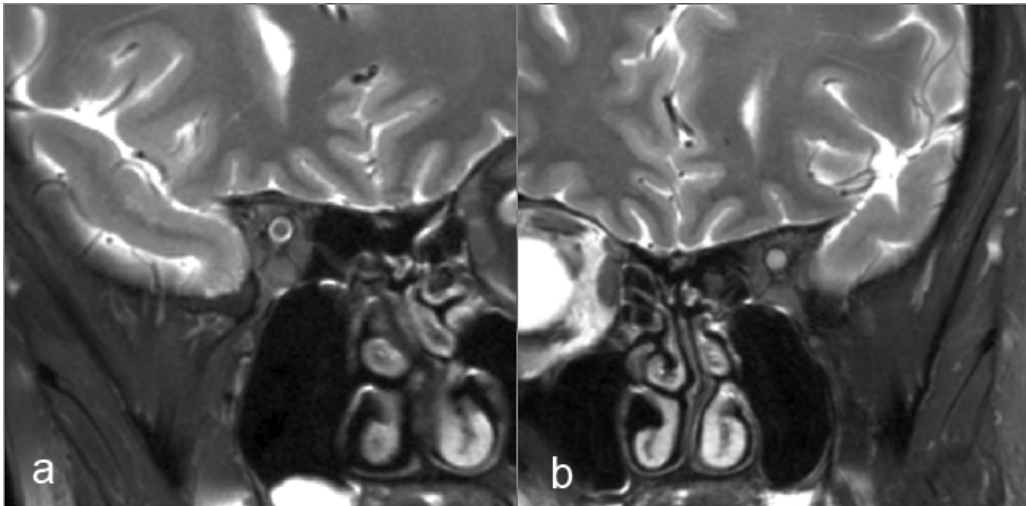

**Supplementary Figure 3:** Coronal-oblique magnetisation transfer imaging of the right optic nerve demonstrating a) MToff; b) MTon; c) MTR map

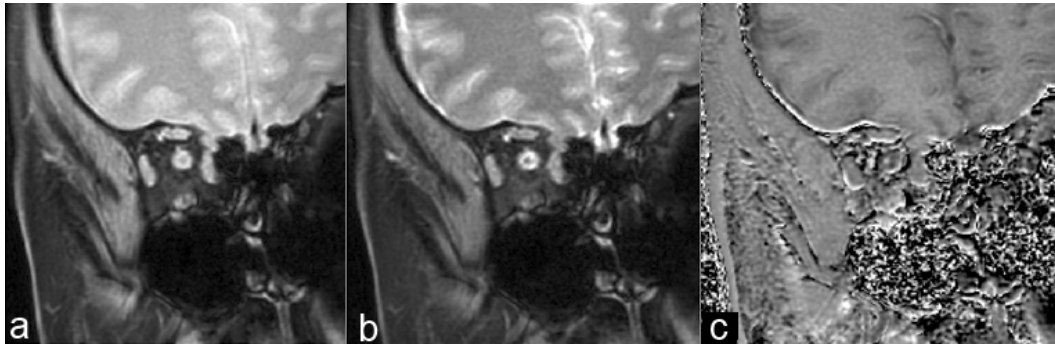

Supplement: jnnp-2014-307650-s1.pdf [file jnnp-2014-307650-s1.pdf]
